# Supplementary material for: Tuning water-responsiveness with Bombyx mori silk–silica nanoparticle composites
Source: Royal Society of Chemistry journal article supplement (doi:10.1039/d1sm00794g), 2021-01-01
Supplement: d1sm00794g2.pdf [file d1sm00794g2.pdf]

## Supplementary Information

### Tuning water-responsiveness with *Bombyx mori* silk-silica nanoparticle composites

Yeojin Jung<sup>a,b</sup>, Samaneh Sharifi Golru<sup>a,c</sup>, Tai-De Li<sup>b,d</sup>, Elizabeth J. Biddinger<sup>a,c</sup>, Raymond S. Tu<sup>a,b\*</sup>, and Xi Chen<sup>a,b,c,e\*</sup>

<sup>a</sup>Department of Chemical Engineering, The City College of New York, 160 Convent Avenue, New York, NY 10031, USA

<sup>b</sup>Advanced Science Research Center (ASRC) at the Graduate Center, City University of New York, 85 St. Nicholas Terrace, New York, NY 10031, USA

<sup>c</sup>Ph.D. Program in Chemistry, The Graduate Center of the City University of New York, 365 Fifth Avenue, New York, NY 10016 USA

<sup>d</sup>Department of Physics at The City College of New York, City University of New York, 160 Convent Avenue, New York, NY 10031, USA

<sup>e</sup>Ph.D. Program in Physics, The Graduate Center of the City University of New York, 365 Fifth Avenue, New York, NY 10016 USA

#### Supplementary Figures:

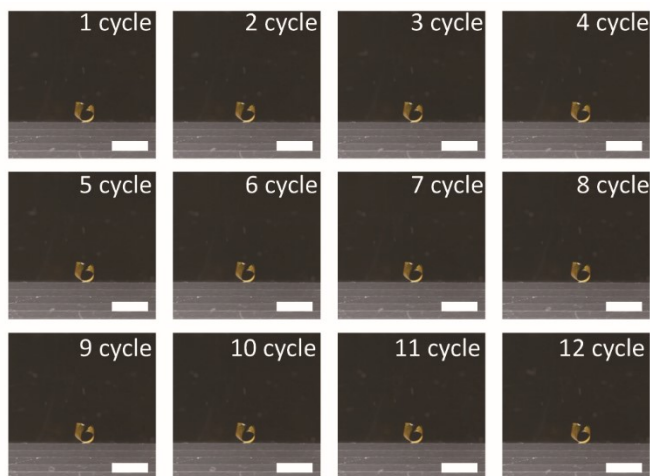

**Fig. S1** The film with SFSiNP 17 reversibly bends when subjected to repeated changes in RH (10% -90% RH).

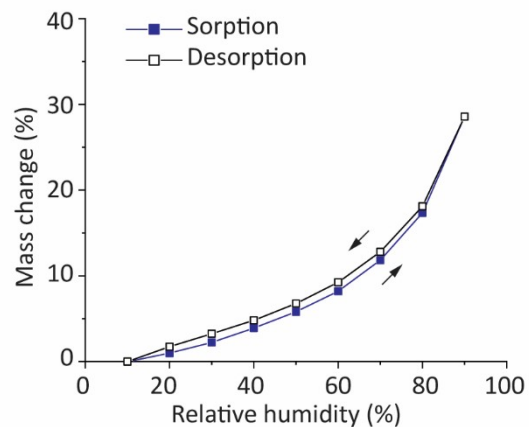

**Fig. S2** DVS water sorption isotherm of SFSiNP 17 when RH is cycled between 10% and 90%.

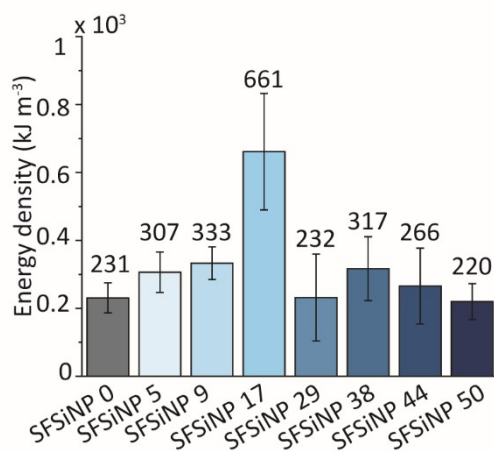

**Fig. S3** SFSiNP composites' WR energy densities with different SiNP's concentrations (0-50 vol%).

**Legend for Supplementary Movies:**

**Movie S1.** The film with SFSiNP 17 reversibly bends and straightens in response to RH changes between 10% and 90% (Playback speed: 10X).
